# Supplementary material for: Dishevelled1-3 contribute to multidrug resistance in colorectal cancer via activating Wnt/β-catenin signaling
Source: PubMed Central journal article supplement (PMC5777814; doi:10.18632/oncotarget.23253), 2017-12-14
Supplement: oncotarget-08-115803-s001.pdf [file oncotarget-08-115803-s001.pdf]

## Dishevelled1-3 contribute to multidrug resistance in colorectal cancer via activating Wnt/ $\beta$ -catenin signaling

### SUPPLEMENTARY MATERIALS

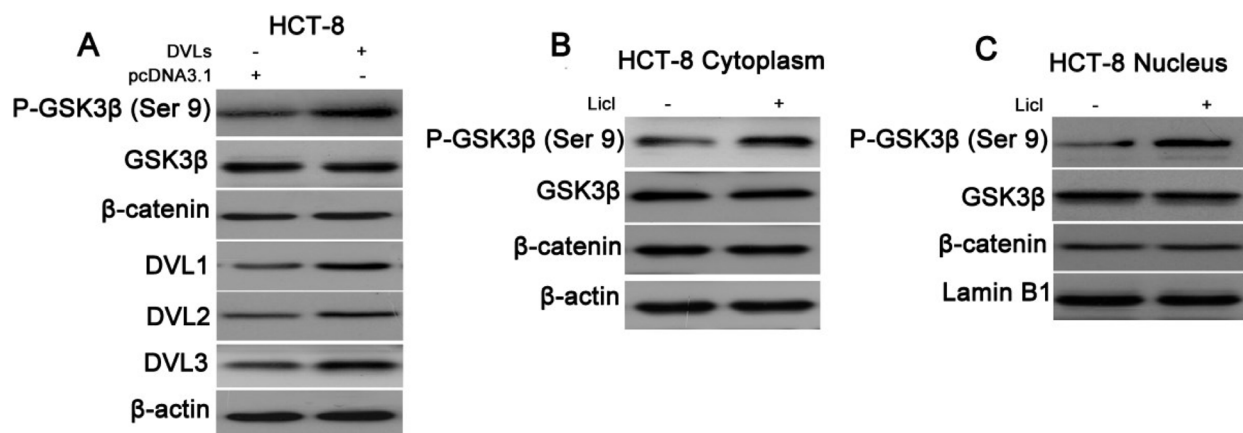

**Supplementary Figure 1:** (A) DVL inhibited GSK3 $\beta$  activity. HCT-8 cells transfected with pcDNA3.1-Flag, or transfected with pcDNA3.1-Flag-DVLs (pcDNA3.1-Flag-DVL1 plus pcDNA3.1-Flag-DVL2 and pcDNA3.1-Flag-DVL3) for 72 h, were lysed to examine expressions of GSK3 $\beta$ , P-GSK3 $\beta$  (Ser9),  $\beta$ -catenin and DVL1-3 using Western blotting. (B) and (C) The GSK3 $\beta$  inhibitor Licl did not control the accumulation of  $\beta$ -catenin in cytoplasm and nucleus. HCT-8 cells treated with Licl (20 mM) for 72 h, were lysed to examine cytoplasmic and nuclear protein levels of GSK3 $\beta$ , P-GSK3 $\beta$  (Ser9) and  $\beta$ -catenin using Western blotting. In each case, the blot is representative of immunoblots resulting from three separate experiments.
